# Multistability in cellular differentiation enabled by a network of three mutually repressing master regulators

Running title: Tristability in a toggle triad

Atchuta Srinivas Duddu<sup>1</sup>, Souvadra Haiti<sup>2</sup>, Siddharth Jhunjunwala<sup>1</sup>, Mohit Kumar Jolly<sup>1,\*</sup>

<sup>1</sup> Centre for BioSystems Science and Engineering, Indian Institute of Science, Bangalore, India

<sup>2</sup> UG Programme, Indian Institute of Science, Bangalore, India

\*Author to whom correspondence to be addressed: [mkjolly@iisc.ac.in](mailto:mkjolly@iisc.ac.in) (M.K.J.)

## Abstract

Identifying the design principles of complex regulatory networks driving cellular decision-making remains essential to decode embryonic development as well as enhance cellular reprogramming. A well-studied network motif involved in cellular decision-making is a toggle switch – a set of two opposing transcription factors A and B, each of which is a master regulator of a specific cell-fate and can inhibit the activity of the other. A toggle switch can lead to two possible states – (high A, low B) and (low A, high B), and drives the ‘either-or’ choice between these two cell-fates for a common progenitor cell. However, the principles of coupled toggle switches remains unclear. Here, we investigate the dynamics of three master regulators A, B and C inhibiting each other, thus forming three coupled toggle switches to form a toggle triad. Our simulations show that this toggle triad can drive cells into three phenotypes – (high A, low B, low C), (low A, high B, low C), and (low A, low B, high C). This network can also allow for hybrid or ‘double positive’ phenotypes – (high A, high B, low C), (low A, high B, high C) and (high A, low B, high C), especially upon including self-activation loops on A, B and C. Finally, we apply our results to understand the cellular decision-making in terms of differentiation of naïve CD4+ T cells into Th1, Th2 and Th17 states, where hybrid Th1/Th2 and hybrid Th1/Th17 cells have been reported in addition to the Th1, Th2 and Th17 ones. Our results offer novel insights into the design principles of a multistable network topology and provides a framework for synthetic biology to design tristable systems.

## Keywords

Multistability, Toggle switch, Toggle triad, Phenotypic plasticity, T-cell differentiation

## Introduction

Elucidating the operating principles of complex regulatory networks driving cellular decision-making is a central question in dynamical systems biology. A central tenet involved in decision-making is the ability of cells to exhibit more than one stable states (phenotypes) in response to varying intracellular and/or extracellular conditions, without altering their genetic content. This feature is called as multistability (co-existence of more than one stable states/phenotypes) and is implicated in cellular differentiation and reprogramming [1]. Thus, decoding the emergent dynamics of multistable biological networks hold great promise not only for mapping the cellular differentiation paths, but also for synthetic biology and regenerative medicine applications [2,3].

A commonly observed network motif involved in enabling multistability is a toggle switch, i.e. a set of two opposing transcription factors A and B, each of which is a master regulator of a specific cell-fate and can inhibit the activity of the other through direct or indirect mechanisms. This mutual repression can allow for two states – (high A, low B) and (low A, high B), and drives the ‘either-or’ choice between two cell-fates for a common progenitor cell [2]. For instance, in hematopoietic stem cells, mutual repression between PU.1 and GATA1 can drive a common myeloid progenitor to a myeloid cell fate (high PU.1, low GATA1) or an erythroid one (low PU.1, high GATA1) [2]. This mutual exclusion of the two master regulators in the two states is critical for establishing stable cellular identities, and can shepherd an ‘all-or-none’ response instead of a graded one [4–6]. The construction of a toggle switch synthetically in *E. coli* set the stage for synthetic biology, when cells were shown to exhibit two states (bistability) and the ability to flip between them in response to transient stimuli [7]. Toggle switches and bistability is present in diverse biological contexts [8–10], and have received enough theoretical attention for their dynamics too [11–14].

One or both of the two master regulators in a toggle switch (A and B) can self-activate. Such self-activating toggle switches can allow for the existence of one more stable state (medium A, medium B) in addition to the two driven by a toggle switch. This third state often corresponds to a common progenitor cell-state, as seen across many instances of cellular differentiation [2,15]. This ‘intermediate’ progenitor state is often ‘metastable’ and can differentiate to one of the two relatively more stable terminal states [2]. However, the dynamics of networks giving rise to three distinct states with a common progenitor have not been relatively well-studied, despite instances of such decision-making seen in differentiation of CD4 expressing T-cells [16,17].

Here, we investigate the emergent dynamics of a set of three mutually repressing master regulators (A, B and C), and show that this ‘toggle triad’ can lead to the co-existence of three distinct phenotypes – (high A, low B, low C), (low A, high B, low C), and (low A, low B, high C). In addition to these three ‘single positive’ or differentiated phenotypes, the three ‘double positive’ states – (high A, high B, low C), (high A, low B, high C), and (low A, high B, high C) – can also be observed, although at a lower frequency. Adding self-activation on these master regulators can enrich for the existence of these ‘double positive’ phenotypes that can be thought of as intermediate cell states between the corresponding ‘single positive’ or differentiated states. Our results offer a mechanistic explanation of how a ‘toggle triad’ formed among ROR $\gamma$ T, GATA3 and T-bet can allow for three distinct T-cell states – Th1 (high T-bet, low GATA3, low ROR $\gamma$ T), Th2

(low T-bet, high GATA3, low ROR $\gamma$ T), Th17 (low T-bet, low GATA3, high ROR $\gamma$ T) as well as corresponding hybrid cell fates originating from a common progenitor states (naïve CD4<sup>+</sup> T cell).

## Results

### Toggle triad can allow for co-existence of three phenotypes (tristability)

The emergent dynamics of simple two-component and three-component networks such as toggle switch and repressilator has been well-investigated [11–14,18–20]. A toggle switch (i.e. a set of two mutually repressing transcription factors) (**Fig 1A**) can lead to two phenotypes – (high A, low B) and (low A, high B), thus  $A/B \ll 1$  or  $A/B \gg 1$  for the two stable states (**Fig 1B**). This stark difference in the relative levels of A and B in the two states can drive cellular differentiation, as seen in multiple scenarios during embryonic development [2]. These two phenotypes may co-exist (bistable region) for certain range of parameters (green shaded region in Fig 1C); however, tuning the levels of various cell-intrinsic or cell-extrinsic signals can lead to one of the states being destabilized, thus leading to two different monostable regions (pink shaded regions in **Fig 1C**).

A repressilator (**Fig 1D**; a cyclic arrangement of three inhibitory transcription factors), on the other hand, does not lead to multiple stable states, instead can display sustained or damped oscillations. Here, we investigate the dynamics of various possible couplings between the topology of these two well-characterized network motifs in different three-component systems. In a repressilator topology, either one (R+ 1TS), two (R+ 2TS) or three (R+3TS) toggle switches were integrated. The network formed by a set of three mutually repressing regulators is hereafter referred to as a ‘toggle triad’ (TT). Further, one, two or three of these regulators have been considered to be self-activatory as well (TT + 1SA; TT + 2 SA; TT+ 3 SA) (**Fig 1E**).

Next, to investigate the robust dynamical features of the abovementioned network topologies, we used a recently developed computational tool – RACIPE [21]. RACIPE takes the network topology as an input and converts it into a set of coupled ordinary differential equations (ODEs) to represent the set of interactions in that network topology. RACIPE samples 10,000 sets of parameters within a biologically relevant range, i.e. it generates an ensemble of mathematical models, each with a different parameter set. For every chosen parameter set, RACIPE chooses a random set of initial conditions for each node in the network, simulates the dynamics, and reports the different possible steady-state values for each node. Thus, each parameter set or kinetic model simulated via RACIPE corresponds to a different combination of parameters, reflecting cell-to-cell heterogeneity in biochemical reaction rates. An ensemble of models denotes the behavior of a cell population and statistical tools are then applied to identify the robust dynamic properties of the given network.

Here, each kinetic model is a set of three coupled ODEs, each of which tracks the dynamics of the levels of three interconnected molecular players A, B and C in various network topologies. Each of them have innate rates of production and degradation; the net production rate is affected by transcriptional regulation from other nodes; for instance, the inhibition of B by A in repressilator (R), repressilator + 1 toggle switch (R+1TS), repressilator + 2 toggle switches (R + 2 TS), and the

toggle triad (TT) (**Fig 1D**). The set of differential equations is solved numerically to attain steady-state values of each node. For each given parameter set, depending on the initial condition, each of these molecular players can converge to one or more possible steady states enabled by the given parameter set. Thus, a circuit considered can be potentially multi-stable (i.e. two or more phenotypes).

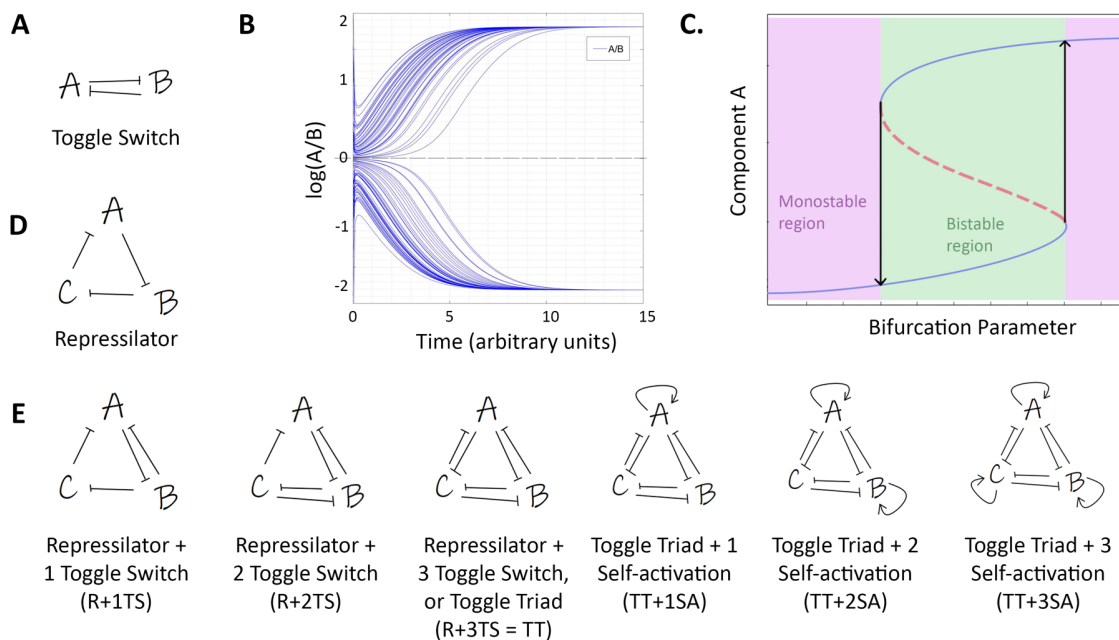

**Figure 1: Network schematics.** **A)** Toggle Switch. **B)** Dynamics of a toggle switch – different initial conditions can lead to two states:  $A/B \gg 1$  or  $A/B \ll 1$ . **C)** Schematic of the bifurcation diagram of a toggle switch. Solid blue curves indicate stable states; red dotted curves indicate unstable states. Bidirectional arrows show transition among different states. Green shaded region shows bistable region; pink shaded regions show two possible monostable regions. **D)** Schematic of a repressilator. **E)** Schematics of network topologies – repressilator with one, two, or three toggle switches (R+1TS, R+2TS, R+3TS = toggle triad), toggle triad with one, two, or three self-activations (TT+1SA, TT+2SA, TT+3SA).

For all seven network topologies – R, R + 1TS, R + 2 TS, TT, TT + 1 SA, TT + 2SA, TT + 3 SA (**Fig 1D**), we use RACIPE to quantify the number of parameter sets that led to only one phenotype (monostable) as well as those that led to two (bistable) and three (tristable) phenotypes. A repressilator has been shown to be capable of generating sustained or damped oscillations but not multistability; thus, as expected, the parameter sets generated by RACIPE enabled either monostability (damped oscillations) or sustained oscillations (**Fig 2A, S1**). As we include more inhibitory links in the network topology, moving from a repressilator to a toggle triad, the frequency of parameter sets leading to monostability decrease continuously, and those leading to multistable solutions – either bistable or tristable – increase (**Fig 2A**). Next, we investigate the dynamics of toggle triad with one or more self-activations included (TT, TT + 1SA, TT + 2SA, TT + 3SA) via RACIPE (**Fig 2B**). A toggle triad has ~53% of parameter sets driving monostability; this frequency sharply decreases as one or more self-activations were included in the network topology. Instead,

the frequency of parameter sets enabling tristability monotonically increase as we add more self-activations; while that of parametric combinations corresponding to bistability increases initially but decreases again (**Fig 2B**). Put together, a toggle triad – with or without one or more self-activation links (TT, TT + 1SA, TT + 2 SA, TT + 3SA) – is capable of exhibiting tristability, i.e. co-existence of three distinct stable states (phenotypes).

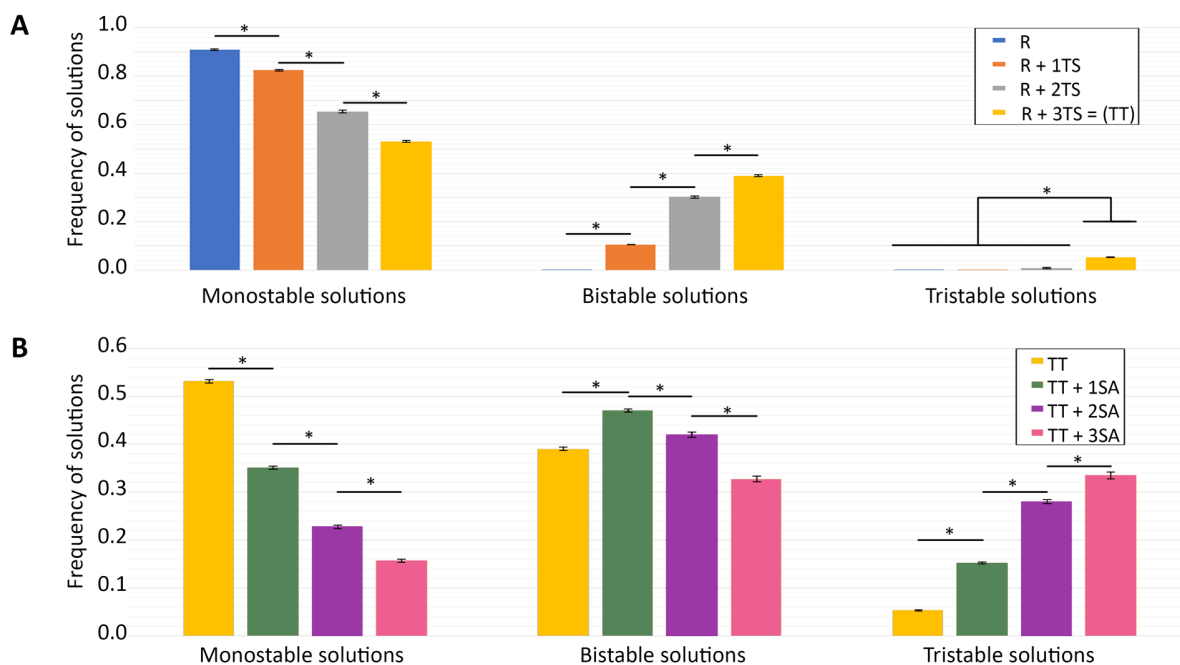

**Figure 2: RACIPE outputs for networks shown in Fig 1E. A, B) Frequency of parameter sets used by RACIPE that enable monostable, bistable, tristable solutions for different networks.  $N=3$  independent RACIPE replicates were done; error bars denote standard deviation. \* denotes  $p < 0.05$  for a Student's  $t$ -test.**

### Toggle triad can enable three predominant states – (high A, low B, low C), (low A, high B, low C) and (low A, low B, high C)

We next characterized the different steady states/phenotypes that a toggle triad can allow for, as identified by RACIPE. A toggle triad allows for ~53% monostable cases, ~39% bistable cases, and ~5% tristable cases (**Fig 3A**). We collated the levels of A, B and C obtained from all parameter combinations obtained via RACIPE and plotted them as a heatmap. This heatmap revealed three predominant states – (high A, low B, low C), (low A, high B, low C) and (low A, low B, high C) – represented by {Abc}, {aBc} and {abC} respectively hereafter. In addition to these states, a few instances of (high A, high B, low C), (high A, low B, high C) and (low A, high B, high C) – denoted by {ABC}, {AbC}, and {aBC} states respectively hereafter – were also observed (**Fig 3B**). These results indicate that a toggle triad can enable for states with one of the master regulators being relatively higher than the other two ('single positive' states), as well as those with two master regulators being relatively higher than the third one ('double positive' states).

Reinforcing the trends seen in the heatmap, we observed that the distributions of levels of each of the three players A, B and C obtained via all RACIPE solutions was largely bimodal (**Fig S2**), indicating that each node in the network can exist in either a “high” or a “low” state. Thus, a total of  $8 (= 2^3)$  states can exist for a toggle triad. Further, we quantified the relative frequency of these 8 possible steady states among monostable solutions. Among the parameter sets enabling monostable solutions, ~60% cases led to the ‘single positive’ {Abc}, {aBc}, {abC} states, ~36% of cases led to the ‘double positive’ {ABc}, {aBC}, {AbC} states, while only 4% of the cases led to ‘triple positive’ (high A, high B, high C - {ABC}) or ‘triple negative’ (low A, low B, low C - {abc}) states (**Fig 3C**). Owing to the symmetric nature of the toggle triad, there was striking symmetry in the number of parameter cases leading to each of the three ‘single positive’ or ‘double positive’ states as well; i.e.  $\sim 60/3 = 20\%$  of parameter sets each converged to {Abc}, {aBc} or {abC} as a steady state, and  $\sim 36/3 = 12\%$  of parameter sets converged to {ABc}, {aBC} or {AbC} as a steady state (**Fig 3C**). Given the negligible frequency of the ‘triple positive’ and the ‘triple negative’ solutions, they were excluded from our further analysis.

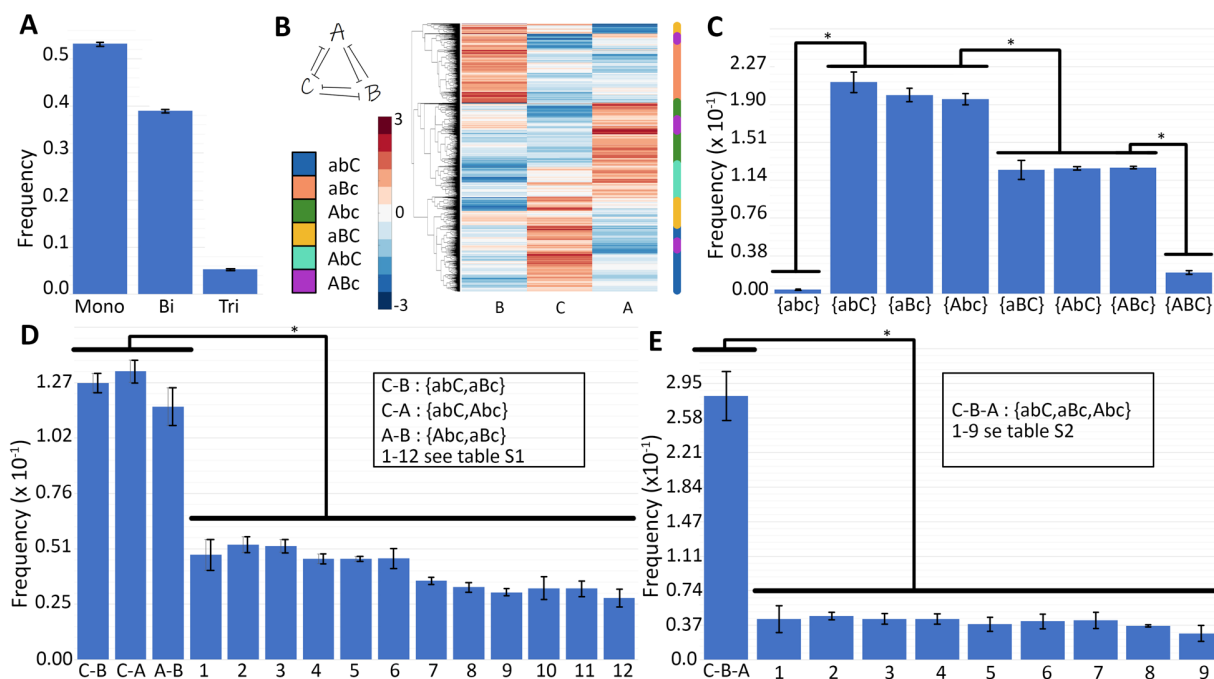

**Figure 3: Characterization of a toggle triad.** **A)** Frequency of monostable, bistable, tristable solutions for a toggle triad. **B)** Heatmap showing the monostable solutions for a toggle triad; the nomenclature shown capitalizes the node whose levels are relatively high. Thus, Abc denotes (A-high, B-low, C-low), aBc denotes (A-low, B-high, C-low), abC denotes (A-low, B-low, C-high) (three ‘single positive’ states). Abc denotes (A-high, B-high, C-low), AbC denotes (A-high, B-low, C-high), and aBC denotes (A-low, B-high, C-high) (three ‘double positive’ states). ABC denotes (A-high, B-high, C-high) (triple positive), abc denotes (A-low, B-low, C-low) (triple negative) states. **C)** Frequency of  $8 (= 2^3)$  possible monostable solutions. **D, E)** Frequency of different bistable and tristable cases; with the most frequent ones being combinations of Abc, aBc and abC = {Abc, aBc}, {aBc, abC}, {abC, Abc} (bistable) and {aBc, Abc, abC} (tristable). Error bars represent the standard deviation over  $n=3$  independent replicates of RACIPE. \*:  $p < 0.05$  for Students’ t-test.

We next examined the frequency distribution of parameter sets leading to bistable solutions. Here, a total of 15 ( $={}^6C_2$ ; number of ways to choose two out of six solutions) phases (i.e. combinations of steady states). The three most common phases were the ones with co-existing 'single positive' states, i.e. {Abc, aBc}, {aBc, abC} and {Abc, abC}, totaling up to ~42% of all parameter sets (**Fig 3D, Table S1**). The remaining 12 combinations of steady states were obtained from a cumulative ~56% of parameter sets enabling bistability. Similarly, among a total of 20 ( $={}^6C_3$ ; number of ways to choose three out of six solutions) tristable solutions, the most frequent combination was the set of co-existing 'single positive' states, i.e. {Abc, aBc, abC} (~30% parameter sets) (**Fig 3E, Table S2**). Put together, these results suggests that one of the underlying design principles of a toggle triad is to allow the existence (or co-existence) of phenotypes where the levels of one of the three components is much larger than the remaining two, i.e. both  $A/B \gg 1$  and  $A/C \gg 1$  (i.e. {Abc}), or both  $B/A \gg 1$  and  $B/C \gg 1$  (i.e. {aBc}) or both  $C/A \gg 1$  and  $C/B \gg 1$  (i.e. {abC}).

### The dynamical traits of a toggle triad are specific to its network topology

To further test that the abovementioned design principles are specific to the toggle triad topology, we investigated the dynamics of multiple three-component networks where one or more of the six inhibitory links in a toggle triad has/have been replaced with an activatory link (circuits C1-C14; **Fig S3**). All of the 14 circuits failed to exhibit at least one of the salient features of toggle triad, when comparing the state frequency for parameter sets enabling monostable solutions: a) the frequency of 'triple positive' and 'triple negative' states is negligible (8/14 cases have 18% or more parameter sets leading to either of these two states), b) the relative frequency of all three 'single positive' states was the same, c) the relative frequency of all three 'double positive' states was the same, and d) the 'single positive' states were more frequent than the 'double positive' ones (**Table S3**). As expected, the circuit with all inhibitory links in a toggle triad replaced by activation (C2) showed the 'triple negative' and 'triple positive' states as the most predominant ones. Similarly, when comparing the results for bistable and tristable scenarios, none of the 14 circuits showed the co-existence of 2 (in case of bistable) or 3 (in case of tristable) 'single positive' cases as the predominant trend as seen in case of a toggle triad (**Tables S4, S5**). Finally, the percentage distribution of parameter sets that led to monostable, bistable and tristable solutions were quite different for these 14 circuits as compared to a toggle triad (**Table S6, Fig S4-S9**). To gain further confidence in these results via RACIPE, we simulated the dynamics of toggle triad and circuit C2 using asynchronous Boolean modeling approach [22] – a parameter-independent approach – and observed similar trends as seen in RACIPE, suggesting the key role of network topology instead of specific parametric combinations in enabling these robust design dynamical principles of a toggle triad (**Table S7**). Overall, these results strengthen the association of a toggle triad formed by A, B and C with the existence/co-existence of these states – (high A, low B, low C), (low A, high B, low C) and (low A, low B, high C).

Unlike a toggle switch, a toggle triad can be 'frustrated', i.e. whereas a toggle switch allows for two mutually exclusive states which be self-stabilizing, such a feature need not be present in a toggle triad. Once one of the states, say (high A, low B), is attained in a toggle switch, the inhibition of A by B is much weaker than the inhibition of B by A, thus leading to maintenance of the state. A toggle triad is a combination of three toggle switches – that between A and B, that between B

and C, and that between C and A. In a toggle triad, an increase in levels of A can drive low levels of B which can consequently upregulate levels of C, thus suggesting simultaneously high levels of A and C which is not consistent with the toggle switch trying to drive an antagonistic relationship between the levels of A and C, thus leading to ‘frustration’ [23]. We next scrutinized how despite this ‘frustration’, a toggle triad can allow for the existence of its most predominant states – (high A, low B, low C), (low A, high B, low C) and (low A, low B, high C).

We hypothesized that in parameter sets that lead to the existence of monostable cases of (high A, low B, low C), the inhibition of B and C by A was much stronger than the inhibition of A by B and/or C. In RACIPE formulation, the effect of inhibition from one node to another is captured by a shifted Hill function described by three independent parameters:  $n$  (cooperativity),  $\lambda$  (fold change), and  $H_0$  (half-maximal concentration or threshold) [21]. The higher the value of  $n$ , the stronger the repression, and the higher the value of  $H_0$ , the weaker the repression. For inhibitory links,  $\lambda$  varies between 0 (very strong repression) to 1 (no effect). Thus, the higher the value of  $x = n/(\lambda * H_0)$ , the stronger the corresponding inhibition. For all monostable cases leading to (high A, low B, low C) state,  $74 \pm 1.7\%$  of cases had a stronger  $x(A \rightarrow B)$  as compared to  $x(B \rightarrow A)$ , i.e. the inhibition of B by A was stronger than the inhibition of A by B (**Fig 4A**, left column). Similarly,  $73 \pm 0.6\%$  of cases had a stronger  $x(A \rightarrow C)$  as compared to  $x(C \rightarrow A)$  (**Fig 4A**, middle column). Further, there was a significant overlap in parameter sets for which the relative strength of inhibition by A on either B or C was more than that of the inhibitory link from C or B to A (**Fig 4A**, right column; **S4A**). This large overlap was specific to the scenarios when A inhibited B and C strongly as compared to its inhibition by them, further endorsing our hypothesis (**Fig S4B**).

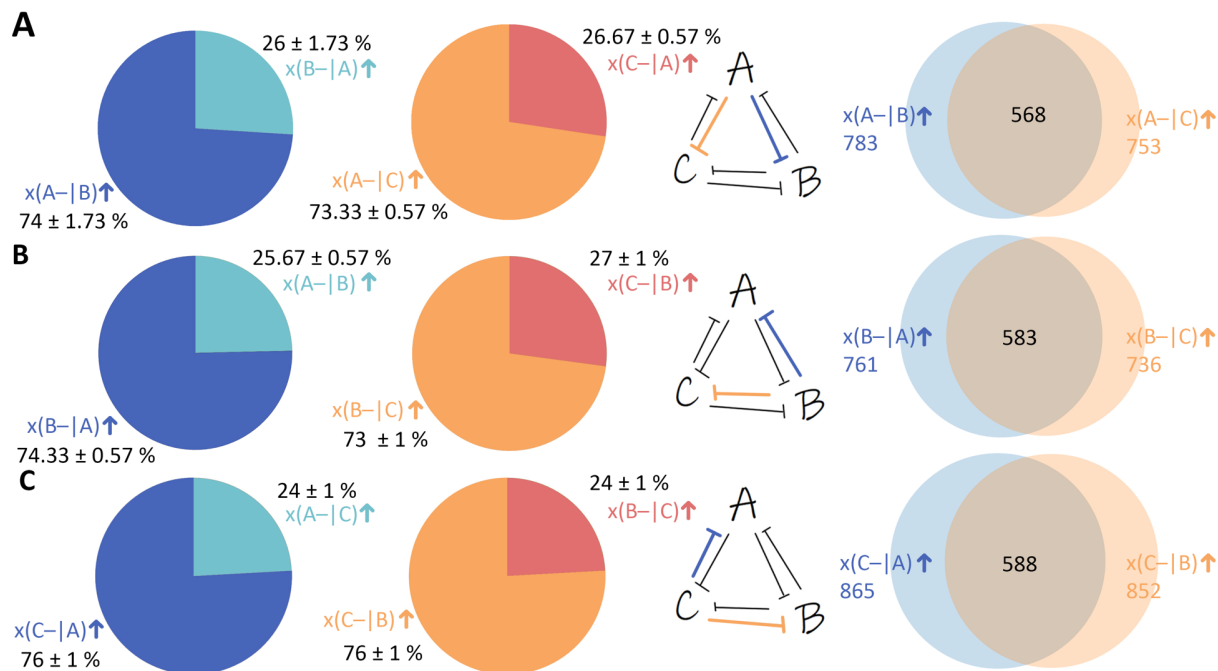



**Figure 4: Frustration in a toggle triad. A)** For parameters corresponding to the *Abc* (A-high, B-low, C-low) state, the pie charts show the percentage of cases where inhibition of the ‘high’ component (here: A) on the other components (here: B, C) is relatively stronger compared to the inhibition of A ( $x(A \rightarrow B)$  and  $x(A \rightarrow C)$ ) and vice-versa ( $x(B \rightarrow A)$  and  $x(C \rightarrow A)$ ). Venn diagrams show the intersection of the cases shown in pie charts. Mean  $\pm$  standard deviation over three independent replicates. The more dominant case in pie chart is highlighted in the circuit schematic drawn. **B), C)** Same as A but for the *aBc* (A-low, B-high, C-low) and *abC* (A-low, B-low, C-high) states respectively.

Similar trends were considered when the monostable parameter sets enabling (low A, high B, low C) or (low A, low B, high C) were analyzed, i.e. the inhibition of A and C by B was relatively stronger and the inhibition of A and B by C was relatively stronger respectively (**Fig 4B-C, S11-S12**). Overall, a relatively stronger inhibition of two nodes (for example B and C) by another node (for example A) can drive the levels of two inhibited nodes (B and C in this example) too low for their mutual inhibition being functionally active, thus leading to potential resolution of ‘frustration’. Put together, these results reveal the dynamical properties of a toggle triad that allows for the existence of its three most predominant states – (high A, low B, low C), (low A, high B, low C), and (low A, low B, high C).

#### **Toggle triad with self-activations enrich for the existence of ‘double positive’ states**

Next, we probed the dynamics of a toggle triad with self-activations on all three nodes (A, B, C) (TT + 3SA). We collated the steady-state levels of A, B and C obtained from all parameter combinations obtained via RACIPE for this circuit and plotted them as a heatmap. Similar to the case of a toggle triad, the ‘single positive’ (high A, low B, low C), (low A, high B, low C) and (low A, low B, high C) states were predominant. However, as compared to a toggle triad, there was a marked enrichment of the ‘double positive’ states - (high A, high B, low C), (high A, low B, high C) and (low A, high B, high C), i.e. {*ABc*}, {*AbC*}, and {*aBC*} states respectively (**Fig 5A**). Furthermore, in the case of a toggle triad with self-activations, the number of parameter sets enabling monostability was 3.3 fold lower as compared to a toggle triad (53% for TT vs. 16% for TT + 3 SA) and a 6.8 fold increase in those enabling tristability (5% for TT vs. 34% for TT + 3SA) (**Fig 5B-C**). The toggle triad with self-activation also exhibited tetrastable, pentastable and hexastable behavior (13% parameter sets for tetra-stability, 4% for penta-stability) (**Fig 5C**).

The predominance of the ‘single positive’ states and their combinations prevailed in monostable, bistable and tristable parameter sets for the case of a toggle triad with three self-activations (**Table S8-10**). In the tetrastable cases, the top three most predominant combinations contained all the three ‘single positive’ states with one of the three possible ‘double positive’ states – {*Abc*, *aBc*, *abC*, *ABc*}, {*Abc*, *aBc*, *abC*, *AbC*} and {*Abc*, *aBc*, *abC*, *aBC*} (**Fig 5D; Table S11**). Similarly, in pentastable cases, the top three most predominant combinations contained all the three ‘single positive’ states with two of the three possible ‘double positive’ states – {*Abc*, *aBc*, *abC*, *ABc*, *aBC*}, {*Abc*, *aBc*, *abC*, *AbC*, *aBC*} and {*Abc*, *aBc*, *abC*, *ABc*, *AbC*} (**Fig 5E; Table S12**), unraveling the dynamical traits of a toggle triad where each of the master regulator can self-activate. Put together, these results suggest that a toggle triad with self-activation can enrich for the (co-) existence of such ‘double positive’ states.

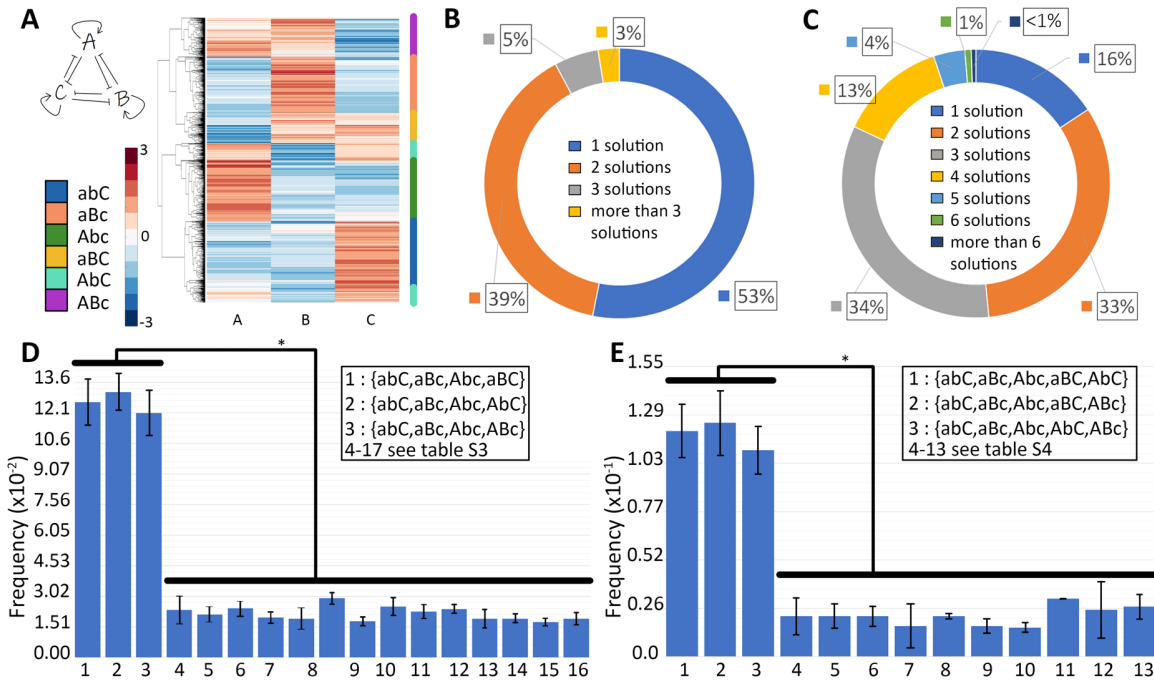

**Figure 5: Characterization of toggle triad with three self-activations ( $TT + 3SA$ ).** **A**) Heatmap showing monostable solutions for  $TT+3SA$ ; Heatmap showing the monostable solutions for a toggle triad; the nomenclature shown capitalizes the node whose levels are relatively high. Thus,  $Abc$  denotes (A-high, B-low, C-low),  $aBc$  denotes (A-low, B-high, C-low),  $abC$  denotes (A-low, B-low, C-high) (three 'single positive' states).  $Abc$  denotes (A-high, B-high, C-low),  $AbC$  denotes (A-high, B-low, C-high), and  $aBC$  denotes (A-low, B-high, C-high) (three 'double positive' states). **B**) Frequency of monostable, bistable, tristable solutions in a toggle triad (TT) shown as a pie chart. **C**) Frequency of monostable, bistable, tristable, tetrastable, pentastable solutions for a  $TT+3SA$  case shown as a pie chart. **D, E**) Frequency of different tetrastable and pentastable phases are combinations of  $Abc, aBc, abC, aBC, AbC, AbC = \{Abc, aBc, abC, aBC\}, \{Abc, aBc, abC, AbC\}, \{Abc, aBc, abC, AbC\}$  (tetrastable) and  $\{aBc, Abc, abC, aBC, AbC\}, \{aBc, Abc, abC, AbC, AbC\}, \{aBc, Abc, abC, aBC, AbC\}$  (pentastable). Error bars denote the standard deviation of  $n=3$  independent RACIPE simulations. \* denotes statistical significance ( $p < 0.05$  for students' t-test).

### Th1/ Th2/ Th17 cell differentiation: a case study of toggle triad

Upon activation, naïve helper T cells differentiate towards a specific helper T cell subset. In the presence of specific activating signals a majority of these cells differentiate towards a particular subset expressing a lineage-specific transcription factor (master regulator). However, a small but significant number of cells may also express multiple master regulators [24]. To understand if the presence of cells expressing multiple master regulators may be explained through the toggle triad system described above, we undertook the case study involving three helper T cell subsets - Th1 (T-bet), Th2 (GATA3) and Th17 (ROR $\gamma$ T). Assuming that these master regulators may mutually repress each other [17] (**Fig 6A**), we projected the steady state solutions obtained from the heatmap for a toggle triad (**Fig 3A**) on the two-dimensional scatter plots for (T-bet, GATA3) axes, (T-bet, ROR $\gamma$ T) axes and (GATA3, ROR $\gamma$ T) axes. The plots showed the emergence of three clusters, each corresponding to a 'single positive' state – blue (high T-bet, low GATA3, low ROR $\gamma$ T

state), orange (low T-bet, high GATA3, low ROR $\gamma$ T state) and green (low T-bet, low GATA3, high ROR $\gamma$ T state) (Fig 6B, S13, S14), corresponding to Th1, Th2 and Th17 cell-fates, respectively. The hybrid 'double positive' (black dots) states were also observed in addition to the 'single positive' states – (high T-bet, high GATA3, high ROR $\gamma$ T), (high T-bet, low GATA3, low ROR $\gamma$ T) and (low T-bet, high GATA3, high ROR $\gamma$ T), although at a lower frequency than the 'single positive' ones. These states can be mapped to hybrid Th1/Th2, Th2/Th17 and Th1/Th17 cell types.

GATA3, T-bet and ROR $\gamma$ T have been found to self-activate directly and/or indirectly. Thus, next, we included self-activation loops (Fig 6C), and projected the steady state solutions obtained from the heatmap for a toggle triad with self-activation (Fig 5A) on the two-dimensional scatter plots for (T-bet, GATA3) axes, (T-bet, ROR $\gamma$ T) axes and (GATA3, ROR $\gamma$ T) axes. Here, we observed the hybrid 'double positive' states at a relatively higher frequency as compared to the toggle triad (Fig 6D, S13, S14). Hence, using the toggle triad model, we can predict the existence and provide a possible mechanistic explanation for the existence of stable hybrid helper T cell phenotypes, which has been shown experimentally at least for Th1/Th2 and Th1/Th17 cells.

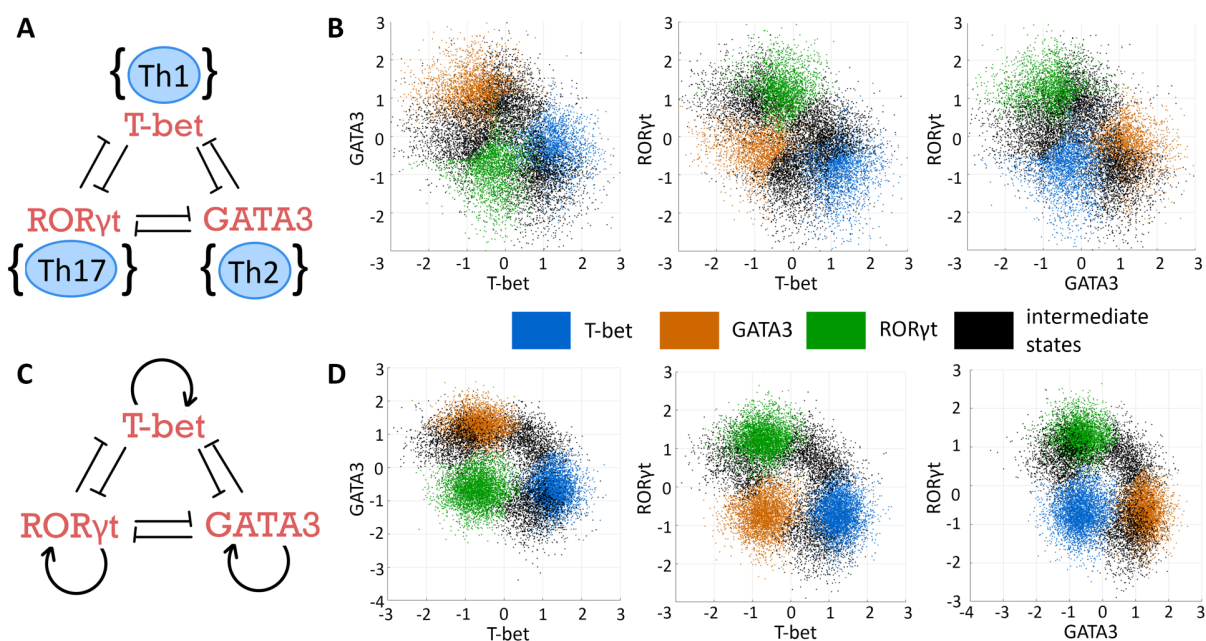

**Figure 6: CD4 T-cell differentiation.** **A)** Network showing proposed interaction among the master regulators of Th1, Th2 and Th17 – T-bet, GATA3 and ROR $\gamma$ T – respectively. **B)** Two-dimensional scatter plots projecting solutions from the heatmap for a toggle triad network (Fig 3). **C)** Network of T-bet, GATA3 and ROR $\gamma$ T including self-activations. **D)** Same as B but for solutions from the heatmap for a toggle triad with 3 self-activation (Fig 5). Blue colored dots denote Th1 (high T-bet, low GATA3, low ROR $\gamma$ T), orange colored dots denote Th2 (low T-bet, high GATA3, low ROR $\gamma$ T), green colored dots denote Th17 (low T-bet, low GATA3, high ROR $\gamma$ T) state. Black dots denote the different hybrid states – Th1/Th2, Th2/Th17 and Th1/Th17: (high T-bet, high GATA3, high ROR $\gamma$ T), (high T-bet, low GATA3, low ROR $\gamma$ T) and (low T-bet, high GATA3, high ROR $\gamma$ T) respectively. Data from respective heatmaps was subjected to k-means clustering to identify these six states (three 'single positive' and three 'double positive' ones).

## Discussion

Dissecting the dynamics of regulatory networks driving cellular differentiation and reprogramming is important to identify the trajectories that cells can take in the high-dimensional gene expression landscape as they commit to a cell-fate. Recent deluge in experimental technologies has enabled inferring these networks and identifying ‘master regulators’ of different cell-fates. Probing these networks from a dynamical systems perspective has helped characterize the ‘landscape’ of cell differentiation as proposed by Waddington over seven decades ago in which a cell – represented by a ball – rolls down into one or more possible branching valleys, each of which represents a stable cellular identity [25].

A frequent occurring network motif that has been identified in developmental decision-making and investigated from a dynamical systems perspective is a toggle switch – a double negative (hence, overall positive) feedback loop between two master regulators A and B. It has been shown to exhibit bistability with the two states being (high A, low B), and (low A, high B), representing a competition between A and B in enforcing the identity they drive and simultaneously repressing the one driven by their competitor [16]. Another well-studied motifs are negative feedback loops with two components (A activates B, B reduces the levels of A, such as p53-MDM2 [26]) or three components (A inhibits B, B inhibits C, and C inhibits A – a repressilator [19,27]) that can lead to sustained or damped oscillations. Often, such positive and negative feedback loops are intricately interlinked in natural biological networks to allow for a more diverse dynamic repertoire enabling bistability and/or oscillations [28–35]. Moreover, such feedback loops may be synchronized within a cell or across cellular populations to facilitate coordinated dynamics [36–38]. However, most theoretical attempts to investigate the coupled networks have been focused on bistable systems.

Here, we present a fundamentally different dynamical trait that can be achieved by three coupled toggle switches, or in other words, three mutually inhibitory ‘master regulators’ A, B and C forming a toggle triad. Our simulations show that the toggle triad network topology can enable tristability, with the three stable states being (high A, low B, low C), (low A, high B, low C), and (low A, low B, high C). Further, three more intermediate/hybrid states among these ‘single positive’ states can be enabled by a toggle triad, particularly when A, B and C can self-activate – (high A, high B, low C), (high A, low B, high C), (low A, high B, high C). In the Waddington landscape perspective, these three ‘double positive’ states can lie between two terminal ‘single positive’ states and can promote trans-differentiation among them (**Fig 7**).

We applied these results to reproduce the dynamics of naïve CD4<sup>+</sup> helper T cells that differentiate to Th1, Th2, or Th17 [39]. Transcription factors T-bet, GATA3 and ROR $\gamma$ T are considered to be the ‘master regulators’ of these cell fates respectively [40]. GATA3 and T-bet can self-activate directly or indirectly, and repress the activities or targets of one another [40,41], similar to a ‘toggle switch’ between two ‘master regulators’ seen in multiple scenarios [2]. In addition to the two mutually exclusive states (high GATA3, low T-bet and low GATA3, high T-bet in this case), self-activation can allow for the stable existence of a hybrid state (high GATA3, high T-bet in this case) [42–45]. Indeed, *in vitro* and *in vivo* experimental evidence has identified such ‘double positive’ individual cells stably co-expressing GATA3 and T-bet, referred to as a Th1/Th2 hybrid phenotype

[44,46–49], reminiscent of hybrid phenotypes seen in other biological scenarios [50,51]. Intriguingly, hybrid Th1/Th2 cells can arise directly from the CD4<sup>+</sup> naïve T cell precursors and/or reprogrammed from the Th2 cells [46,47], thus indicating phenotypic plasticity, a direct consequence of multistability in underlying biological networks [52].

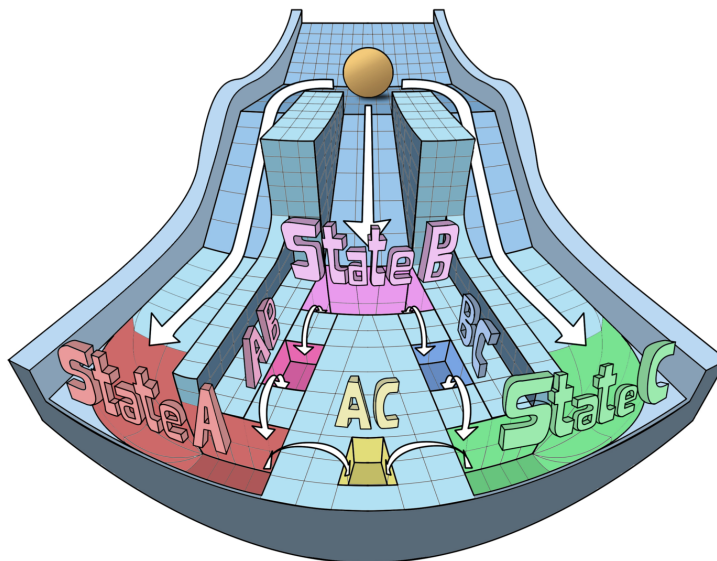

**Figure 7: Waddington landscape for a toggle triad.** Modified Waddington's landscape to demonstrate the differentiation of three distinct 'single positive' states (states A, B and C), and three putative 'double positive' states (hybrid states A/B, A/C and C/B) from a common progenitor. These six states can be obtained from a toggle triad with/without self-activation.

Further, hybrid Th1/Th17 cells that stably persist *in vivo* have been experimentally identified; they express intermediate levels of both Th1 and Th17 signature transcription factors, and exhibit unique transcriptional and metabolic state as compared to Th1 and Th17 cells [53]. The stable *in vivo* existence of both these hybrid Th1/Th2 and Th1/Th17 phenotypes suggests that their relationship may be expressed as 'toggle switches' with self-activation. In addition to self-activation of T-bet and GATA3 discussed above, our model suggests self-activation of ROR $\gamma$ T, which has been recently reported [54]. As an extension of this analysis, we propose a toggle triad involving Th1, Th2 and Th17 cells that reproduces all of the aforementioned predictions, and suggests that a hybrid Th2/Th17 cell could exist. While the stable existence of such cells and any phenotypic plasticity between Th2 and Th17 cells have not yet been reported, our model predicts their possible existence, especially when GATA3, ROR $\gamma$ T and T-bet can self-activate themselves. Finally, the toggle triad model strengthens the hypothesis that the mixed cellular phenotypes are stable cellular identities with specific functional traits, and not just a transient co-expression of these lineage-determining transcription factors, as seen often in common progenitor cells [55].

Besides offering valuable insights into the dynamics of cellular decision-making, our results also pave the way towards designing tristable systems synthetically. Major efforts in synthetic biology have been, so far, targeted towards switches, cascades, pulse generators and oscillators [56–60]. The proposed network topology can be constructed to enable three distinct cell states, whereas including self-activation can facilitate the programming to achieve three hybrid cell states as well.

## Materials and Methods

### RACIPE (RANDOM Circuit Perturbation) Analysis

**Simulation** : RACIPE is a computational tool that investigates the dynamics of a given network topology. A topology file is given as the input to the program. It then simulates, for every parameter set, the network as a system of ordinary differential equations (ODEs) developed based on the input file. For every run of the simulation, every kinetic parameter in the mathematical model is sampled from the defined biologically relevant range, thus giving multiple parameter sets. For each parameter set, the ODEs are solved for 100 initial conditions (default choice). The RACIPE simulation reports the steady state values for each component of the network for every parameter set in the solution file. For all our analyses, we have used the default ranges for sampling the parameters, sampled 10000 parameter sets and 1000 initial conditions for every parameter set.

**Normalization of Steady states** : The steady state solution provided by RACIPE simulation are in log2 scale. We normalized the obtained steady states in the solution files two-fold. To account for extremes in sampling of the production and degradation rate parameters, we performed g/k normalization. We divided every steady state value ( $E_i$ ) in the solution file by the ratio of the production and degradation rate of the respective component ( $g_i/k_i$ ) of the network of the corresponding parameter set. Following that, we performed z-score normalization. We calculated the mean ( $E_{in}$ ) and standard deviation ( $\sigma_{in}$ ) for every component 'i' over all parameter sets after the g/k normalization. The final transformation formula for every steady state is as follows:

$$Z_i = ((E_i / (g_i / k_i)) - E_{in}) / \sigma_{in}$$

where  $Z_i$  is the final normalized expression. We found the distributions of every component to be largely bimodal in nature (Fig S2) with the center of the two modes to be around 0. Thus, we chose to define the states "high" and "low" as greater than and smaller than 0 respectively.

**Clustering and Replicates** : For the hierarchical clustering shown in heatmaps (Fig 3, 5) and other supplementary figures (Fig S4-S9), the clustergram function in MATLAB was used. For coloring of the scatter plots in Fig 6, k-means clustering ( $k = 6$ ) was used to identify the clusters. Since k-means clustering can provide variant results for every run of the function, we confirmed the clusters by running the clustering function for the same data thrice, the latter two replicates (Fig S13, S14) for the networks of Toggle Triad (TT) and Toggle triad with 3 self-activations (TT+3SA) respectively. For every network shown in main text and SI, RACIPE simulations were run thrice to obtain three independent replicates. Further analyses was then performed on these replicates, with the data presented as mean +/- standard deviation (shown by error bars).

### Boolean Analysis

For Boolean analysis as well for TT and C2 circuits, a topological file is given as the input. The file determines the nodes and edges of the network. The edges are of two types, activatory and inhibitory. The analyses carried out were by two methods, synchronous and asynchronous update of the nodes. The constraint of equal weightage to inhibitory and activating links was used, as mentioned in Font-Clos *et al.* PNAS 2018. The updating of the nodes follows a simple majority rule. The ode is updated to 1 if the sum of activations to the node is higher than inhibitions and updated to 0 for the opposite case. The steady state is said to be reached if there is no change in the updates for a few time-steps. We have run the simulations for 10000 initial conditions randomly sampled over all possible states of the network.

### **Acknowledgements**

This work was supported by Ramanujan Fellowship (SB/S2/RJN-049/2018) awarded to MKJ by Science and Engineering Research Board, Department of Science and Technology, Government of India.

### **Author contributions**

MKJ designed and supervised research; ASD and SH conducted research; ASD, SJ, MKJ analyzed data; all authors participated in writing and revision of the manuscript.

### **Conflict of interest**

The authors declare no conflict of interests.

## References

- 1 Guantes R & Poyatos JF (2008) Multistable decision switches for flexible control of epigenetic differentiation. *PLoS Comput Biol* **4**, e1000235.
- 2 Zhou JX & Huang S (2011) Understanding gene circuits at cell-fate branch points for rational cell reprogramming. *Trends Genet* **27**, 55–62.
- 3 Qian Y, McBride C & Del Vecchio D (2018) Programming Cells to Work for Us. *Annu Rev Control Robot Auton Syst* **1**, 411–40.
- 4 Chang HH, Oh PY, Ingber DE & Huang S (2006) Multistable and multistep dynamics in neutrophil differentiation. *BMC Cell Biol* **7**, 11.
- 5 Novick A & Weiner M (1957) Enzyme induction as an all-or-none phenomenon. *Proc Natl Acad Sci U S A* **43**, 553–66.
- 6 Ferrell JE (2012) Bistability, Bifurcations, and Waddington's Epigenetic Landscape. *Curr Biol* **22**, R458–R466.
- 7 Gardner TS, Cantor CR & Collins JJ (2000) Construction of a genetic toggle switch in *Escherichia coli*. *Nature* **403**, 339–342.
- 8 Veening J, Smits WK & Kuipers OP (2008) Bistability, Epigenetics, and Bet-Hedging in Bacteria. *Annu Rev Microbiol* **62**, 193–212.
- 9 Ozbudak EM, Thattai M, Lim HN, Shraiman BI & van Oudenaarden A (2004) Multistability in the lactose utilization network of *Escherichia coli*. *Nature* **427**, 737–40.
- 10 Celià-Terrassa T, Bastian C, Liu DD, Ell B, Aiello NM, Wei Y, Zamalloa J, Blanco AM, Hang X, Kunisky D, Li W, Williams ED, Rabitz H & Kang Y (2018) Hysteresis control of epithelial-mesenchymal transition dynamics conveys a distinct program with enhanced metastatic ability. *Nat Commun* **9**, 5005.
- 11 Jaruszewicz J & Lipniacki T (2013) Toggle switch: noise determines the winning gene. *Phys Biol* **10**, 035007.
- 12 Ma R, Wang J, Hou Z & Liu H (2012) Small-number effects: A third stable state in a genetic bistable toggle switch. *Phys Rev Lett* **109**, 248107.
- 13 Tian T & Burrage K (2006) Stochastic models for regulatory networks of the genetic toggle switch. *Proc Natl Acad Sci U S A* **103**, 8372–8377.
- 14 Lipshtat A, Loinger A, Balaban NQ & Biham O (2006) Genetic toggle switch without cooperative binding. *Phys Rev Lett* **96**, 188101.
- 15 Jia D, Jolly MK, Harrison W, Boareto M, Ben-Jacob E & Levine H (2017) Operating principles of tristable circuits regulating cellular differentiation. *Phys Biol* **14**, 035007.
- 16 Shea JJO, Paul WE & Cells CDT (2012) Mechanisms underlying linear commitment and plasticity of helper CD4+ T cells. *Science (80- )* **1098**, 1098–1103.
- 17 Fang D & Zhu J (2017) Dynamic balance between master transcription factors determines the fates and functions of CD4 T cell and innate lymphoid cell subsets. *J Exp Med* **214**, 1861–1876.
- 18 Ling G, Guan Z-H, He D-X, Liao R-Q & Zhang X-H (2014) Stability and bifurcation analysis of new coupled repressilators in genetic regulatory networks with delays. *Neural Netw* **60**, 222–231.
- 19 Elowitz MB & Leibler S (2000) A synthetic oscillatory network of transcriptional regulators. *Nature* **400**, 335–338.
- 20 Müller S, Hofbauer J, Endler L, Flamm C, Widder S & Schuster P (2006) A generalized model of the repressilator. *J Math Biol* **53**, 905–937.
- 21 Huang B, Lu M, Jia D, Ben-Jacob E, Levine H & Onuchic JN (2017) Interrogating the topological robustness of gene regulatory circuits by randomization. *PLoS Comput Biol* **13**, e1005456.
- 22 Font-Clos F, Zapperi S & La Porta CAM (2018) Topography of epithelial–mesenchymal plasticity. *Proc Natl Acad Sci* **115**, 5902–5907.
- 23 Tripathi S, Kessler DA & Levine H (2019) Biological Regulatory Networks are Minimally



- Frustrated. *arXiv Prepr*, 1911.10252.
- 24 Evans CM & Jenner RG (2013) Transcription factor interplay in t helper cell differentiation. *Brief Funct Genomics* **12**, 499–511.
  - 25 Furusawa C & Kaneko K (2012) A dynamical-systems view of stem cell biology. *Science (80- )* **338**, 215–217.
  - 26 Bar-Or RL, Maya R, Segel LA, Alon U, Levine AJ & Oren M (2000) Generation of oscillations by the p53-Mdm2 feedback loop: A theoretical and experimental study. *Proc Natl Acad Sci U S A* **97**, 11250–11255.
  - 27 Buse O, Pérez R & Kuznetsov A (2010) Dynamical properties of the repressilator model. *Phys Rev E - Stat Nonlinear, Soft Matter Phys* **81**, 066206.
  - 28 Tian XJ, Zhang XP, Liu F & Wang W (2009) Interlinking positive and negative feedback loops creates a tunable motif in gene regulatory networks. *Phys Rev E - Stat Nonlinear, Soft Matter Phys* **80**, 1–8.
  - 29 Tiwari A & Igoshin OA (2012) Coupling between feedback loops in autoregulatory networks affects bistability range, open-loop gain and switching times. *Phys Biol* **9**, 055003.
  - 30 Pfeuty B & Kaneko K (2009) The combination of positive and negative feedback loops confers exquisite flexibility to biochemical switches. *Phys Biol* **6**, 046013.
  - 31 Avendaño MS, Leidy C & Pedraza JM (2013) Tuning the range and stability of multiple phenotypic states with coupled positive–negative feedback loops. *Nat Commun* **4**, 2605.
  - 32 Krishna S, Semsey S & Jensen MH (2009) Frustrated bistability as a means to engineer oscillations in biological systems. *Phys Biol* **6**, 036009.
  - 33 Wang LS, Li NX, Chen JJ, Zhang XP, Liu F & Wang W (2018) Modulation of dynamic modes by interplay between positive and negative feedback loops in gene regulatory networks. *Phys Rev E* **97**, 042412.
  - 34 Page KM (2019) Oscillations in well-mixed, deterministic feedback systems: Beyond ring oscillators. *J Theor Biol* **481**, 44–53.
  - 35 Perez-Carrasco R, Barnes CP, Schaeerli Y, Isalan M, Briscoe J & Page KM (2018) Combining a Toggle Switch and a Repressilator within the AC-DC Circuit Generates Distinct Dynamical Behaviors. *Cell Syst* **6**, 521–530.
  - 36 Nguyen C & Han SK (2010) Synchronization of toggle switches coupled through a common inhibitor. *Europhys Lett* **90**, 10010.
  - 37 Fernandez-Niño M, Giraldo D, Gomez-Porrás JL, Dreyer I, Barrios AFG & Arevalo-Ferro C (2017) A synthetic multi-cellular network of coupled self-sustained oscillators. *PLoS One* **12**, e0180155.
  - 38 Hellen EH & Volkov E (2017) Flexible dynamics of two quorum-sensing coupled repressilators. *Phys Rev E* **95**, 022408.
  - 39 Zhu J, Yamane H & Paul WE (2010) Differentiation of Effector CD4 T Cell Populations. *Annu Rev Immunol* **28**, 445–89.
  - 40 Murphy KM & Stockinger B (2010) Effector T cell plasticity: Flexibility in the face of changing circumstances. *Nat Immunol* **11**, 674–680.
  - 41 Geginat J, Paroni M, Maglie S, Alfen JS, Kastirr I, Gruarin P, de Simone M, Pagani M & Abrignani S (2014) Plasticity of human CD4 T cell subsets. *Front Immunol* **5**, 630.
  - 42 Jia D, Jolly MK, Harrison W, Boareto M, Ben-Jacob E & Levine H (2017) Operating principles of tristable circuits regulating cellular differentiation. *Phys Biol* **14**, 035007.
  - 43 Jolly MK, Boareto M, Lu M, Onuchic JN, Clementi C & Ben-Jacob E (2015) Operating principles of Notch-Delta-Jagged module of cell-cell communication. *New J Phys* **17**, 55021.
  - 44 Antebi YE, Reich-Zeliger S, Hart Y, Mayo A, Eizenberg I, Rimer J, Putheti P, Pe'er D & Friedman N (2013) Mapping differentiation under mixed culture conditions reveals a tunable continuum of T cell fates. *PLoS Biol* **11**, e1001616.
  - 45 Yates A, Callard R & Stark J (2004) Combining cytokine signalling with T-bet and GATA-3

- regulation in Th1 and Th2 differentiation: A model for cellular decision-making. *J Theor Biol* **231**, 181–96.
- 46 Peine M, Rausch S, Helmstetter C, Fröhlich A, Hegazy AN, Kühl AA, Grevelding CG, Höfer T, Hartmann S & Löhning M (2013) Stable T-bet+GATA-3+ Th1/Th2 Hybrid Cells Arise In Vivo, Can Develop Directly from Naive Precursors, and Limit Immunopathologic Inflammation. *PLoS Biol* **11**, e1001633.
- 47 Hegazy AN, Peine M, Helmstetter C, Panse I, Fröhlich A, Bergthaler A, Flatz L, Pinschewer DD, Radbruch A & Löhning M (2010) Interferons Direct Th2 Cell Reprogramming to Generate a Stable GATA-3+T-bet+ Cell Subset with Combined Th2 and Th1 Cell Functions. *Immunity* **32**, 116–128.
- 48 Huang S (2013) Hybrid T-Helper Cells: Stabilizing the Moderate Center in a Polarized System. *PLoS Biol* **11**, e1001632.
- 49 Fang M, Xie H, Dougan SK & Ploegh H (2013) Stochastic Cytokine Expression Induces Mixed T Helper Cell States. *PLoS Biol* **11**, e1001618.
- 50 Jolly MK, Mani SA & Levine H (2018) Hybrid epithelial/mesenchymal phenotype(s): The 'fittest' for metastasis? *Biochim Biophys Acta - Rev Cancer* **1870**, 151–157.
- 51 Huang B, Lu M, Jolly MK, Tsarfaty I, Onuchic J & Ben-Jacob E (2014) The three-way switch operation of Rac1/RhoA GTPase-based circuit controlling amoeboid-hybrid-mesenchymal transition. *Sci Rep* **4**, 6449.
- 52 Jia D, Jolly MK, Kulkarni P & Levine H (2017) Phenotypic Plasticity and Cell Fate Decisions in Cancer : Insights from Dynamical Systems Theory. *Cancers (Basel)* **9**, E70.
- 53 Chatterjee S, Daenthansanmak A, Chakraborty P, Wyatt MW, Dhar P, Selvam SP, Fu J, Zhang J, Nguyen H, Kang I, Toth K, Al-Homrani M, Husain M, Beeson G, Ball L, Helke K, Husain S, Garrett-Mayer E, Hardiman G, Mehrotra M, Nishimura MI, Beeson CC, Bupp MG, Wu J, Ogretmen B, Paulos CM, Rathmell J, Yu XZ & Mehrotra S (2018) CD38-NAD + Axis Regulates Immunotherapeutic Anti-Tumor T Cell Response. *Cell Metab* **27**, 85-100.e8.
- 54 Xiao S, Yosef N, Yang J, Wang Y, Zhou L, Zhu C, Wu C, Baloglu E, Schmidt D, Ramesh R, Lobera M, Sundrud MS, Tsai PY, Xiang Z, Wang J, Xu Y, Lin X, Kretschmer K, Rahl PB, Young RA, Zhong Z, Hafler DA, Regev A, Ghosh S, Marson A & Kuchroo VK (2014) Small-molecule ROR $\gamma$ t antagonists inhibit T helper 17 cell transcriptional network by divergent mechanisms. *Immunity* **40**, 477–489.
- 55 Oestreich KJ & Weinmann AS (2012) Master regulators or lineage-specifying? Changing views on CD4+ T cell transcription factors. *Nat Rev Immunol* **12**, 799–804.
- 56 Tigges M, Marquez-Lago TT, Stelling J & Fussenegger M (2009) A tunable synthetic mammalian oscillator. *Nature* **457**, 309–312.
- 57 Atkinson MR, Savageau MA, Myers JT & Ninfa AJ (2003) Development of genetic circuitry exhibiting toggle switch or oscillatory behavior in *Escherichia coli*. *Cell* **113**, 597–607.
- 58 Basu S, Mehreja R, Thiberge S, Chen MT & Weiss R (2004) Spatiotemporal control of gene expression with pulse-generating networks. *Proc Natl Acad Sci U S A* **101**, 6355–6360.
- 59 Kramer BP, Viretta AU, Baba MD EI, Aubel D, Weber W & Fussenegger M (2004) An engineered epigenetic transgene switch in mammalian cells. *Nat Biotechnol* **22**, 867–870.
- 60 Stricker J, Cookson S, Bennett MR, Mather WH, Tsimring LS & Hasty J (2008) A fast, robust and tunable synthetic gene oscillator. *Nature* **456**, 516–519.
